# Supplementary material for: Tailored products of dealloying as-sintered Al–Cu alloys in sodium hydroxide solutions
Source: Royal Society of Chemistry journal article supplement (doi:10.1039/c5ra12112d), 2015-01-01
Supplement: c5ra12112d1.pdf [file c5ra12112d1.pdf]

Electronic Supplementary Information

**Tailored Products of Dealloying As-sintered Al-Cu alloys in Sodium Hydroxide**

**Solutions**

Jie Li,<sup>a</sup> Zhongxi Yang,<sup>a</sup> Tianning Wang,<sup>a</sup> Nana Yu,<sup>a</sup> Lanju Sun,<sup>a</sup> Chen Nie,<sup>a</sup> Huaide  
Teng,<sup>a</sup> Cheng Jin,<sup>a</sup> Xiutong Chen,<sup>a</sup> Haoran Geng<sup>a,b\*</sup>

<sup>a</sup> *School of Materials Science and Engineering, University of Jinan, West Nan  
Xinzhuang Road 336, Jinan 250022, P. R. China*

<sup>b</sup> *Shandong Provincial Key Laboratory of Preparation and Measurement of Building  
Materials, University of Jinan, West Nan Xinzhuang Road 336, Jinan 250022, P. R.  
China*

**Corresponding author:** Haoran Geng

Email: [2425738495@qq.com](mailto:2425738495@qq.com)

Tel / Fax: +86-0531-82765314

**Supplementary Figures:**

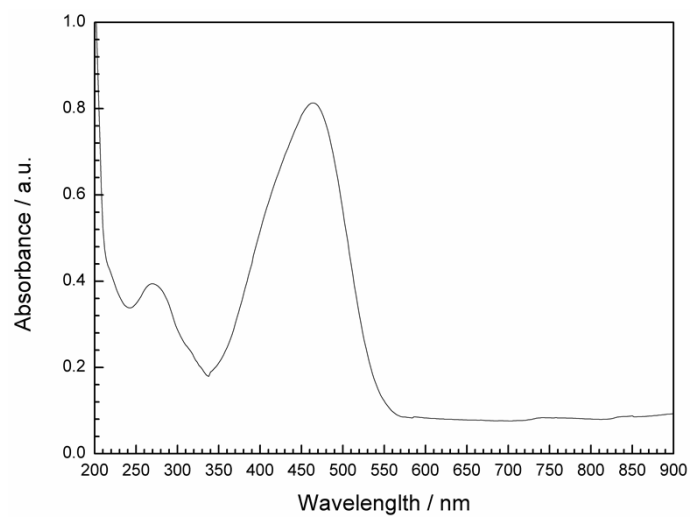

**Figure S1. UV-Vis adsorption spectra of 10mg/L methyl orange solution.**

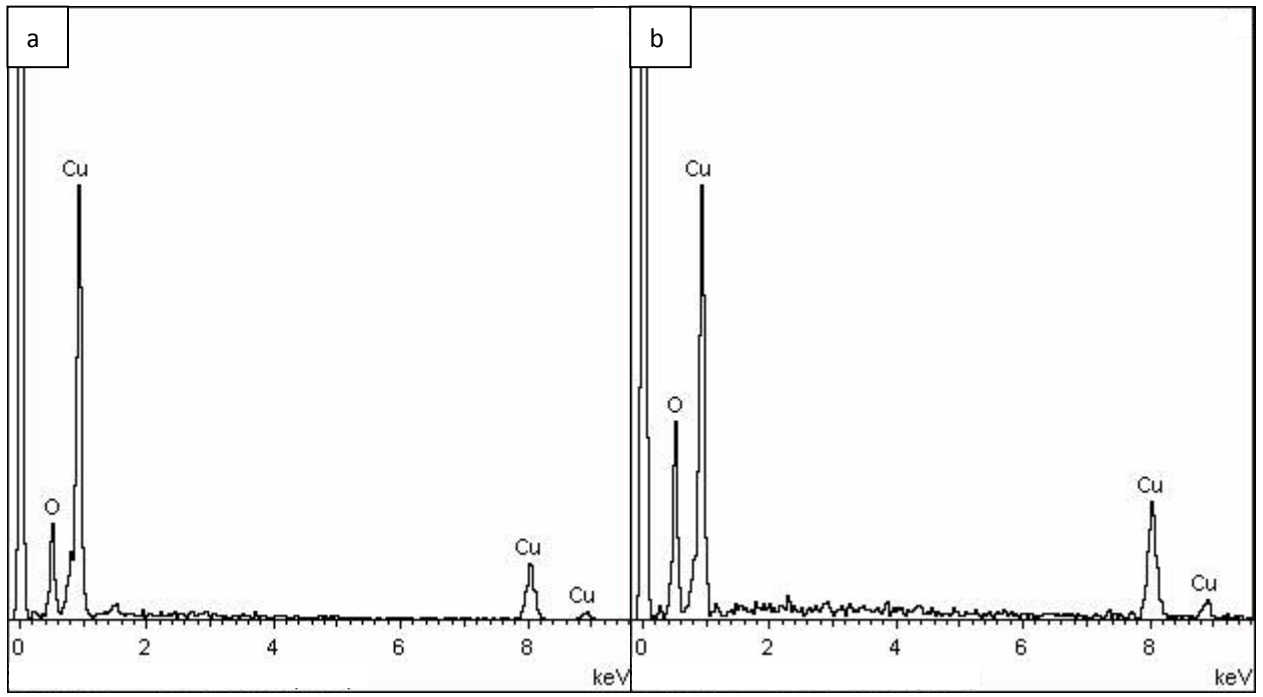

**Figure S2. EDS spectrums of site 1 (a) and site 2 (b) in Fig. 3c.**

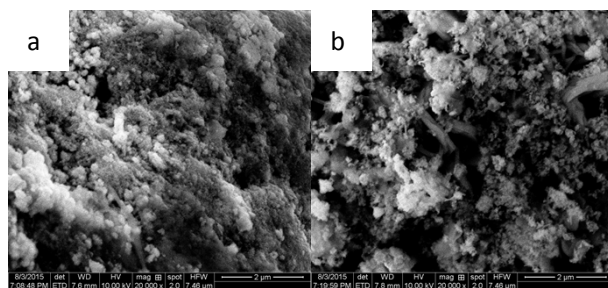

**Figure S3. SEM images showing morphologies of residual catalysts 7 and 8 after ultrasonic irradiating for 120 min.**
